# Supplementary material for: Psychosocial Determinants of HIV Stigma among Men Who Have Sex with Men in San Francisco, California
Source: MDPI journal article supplement (doi:10.3390/ijerph18158031), 2021-07-29
Supplement: s1 [file s1]

**Table S1.** Association between individual characteristics and HIV stigma.

|                             | <b>Model 1</b>         |                       | <b>Model 2</b>        |                       |
|-----------------------------|------------------------|-----------------------|-----------------------|-----------------------|
|                             | <b>ARD (95% CI)</b>    | <b><i>p</i>-value</b> | <b>ARD (95% CI)</b>   | <b><i>p</i>-value</b> |
| <b>Age in years</b>         |                        |                       |                       |                       |
| 13–29                       | 0.241 (0.016, 0.466)   | <b>0.036</b>          |                       |                       |
| 30–49                       | 0.217 (0.058, 0.377)   | <b>0.008</b>          |                       |                       |
| 50 and above                | Reference              |                       |                       |                       |
| <b>Race</b>                 |                        |                       |                       |                       |
| Asian                       | 0.009 (–0.281, 0.299)  | 0.953                 |                       |                       |
| Black or African American   | –0.005 (–0.263, 0.252) | 0.967                 |                       |                       |
| Hispanic or Latinx          | –0.050 (–0.227, 0.126) | 0.575                 |                       |                       |
| Multiple                    | 0.329 (0.060, 0.599)   | <b>0.017</b>          |                       |                       |
| Other                       | 0.343 (–0.081, 0.767)  | 0.113                 |                       |                       |
| White                       | Reference              |                       |                       |                       |
| <b>Injection history</b>    |                        |                       |                       |                       |
| Yes                         | 0.171 (–0.038, 0.379)  | 0.108                 |                       |                       |
| No                          | Reference              |                       |                       |                       |
| <b>Housing status</b>       |                        |                       |                       |                       |
| Homeless                    |                        |                       | 0.964 (0.254, 1.674)  | <b>0.008</b>          |
| Unstable Housing            |                        |                       | 0.416 (0.209, 0.622)  | <b>&lt; 0.001</b>     |
| Stable housing              |                        |                       | Reference             |                       |
| <b>Mental health status</b> |                        |                       |                       |                       |
| Yes                         |                        |                       | 0.304 (0.076, 0.533)  | <b>0.009</b>          |
| No                          |                        |                       | Reference             |                       |
| <b>Viral load</b>           |                        |                       |                       |                       |
| Detectable                  |                        |                       | 0.117 (–0.190, 0.423) | 0.455                 |
| Undetectable                |                        |                       | Reference             |                       |
| <b>Total N</b>              | 541                    |                       | 538                   |                       |
| <b>VIF</b>                  | < 1.1                  |                       | < 1.1                 |                       |

ARD: adjusted risk difference, CI: confidence interval, VIF: variance inflation factor, significant *p* values are in bold..
